# Supplementary material for: Toxicity of Naphthenic Acids on the Chlorophyll Fluorescence Parameters and Antioxidant Enzyme Activity of Heterosigma akashiwo
Source: MDPI journal article supplement (doi:10.3390/antiox10101582), 2021-10-08
Supplement: s1 [file s1]

## SUPPORTING INFORMATION

# Toxicity of Naphthenic Acids on the Chlorophyll Fluorescence Parameters and Antioxidant Enzyme Activity of *Heterosigma akashiwo*

Huanxin Zhang <sup>1, †, \*</sup>, Yumiao Zhou <sup>1, †</sup>, Qiang Kong <sup>1</sup>, Wenlong Dong <sup>2</sup> and Zhihao Lin <sup>3</sup>

<sup>1</sup> College of Geography and Environment, Shandong Normal University, Jinan, 250000, China; [qshdzhhx@126.com](mailto:qshdzhhx@126.com) (H.Z.); [zhouyumiao0802@163.com](mailto:zhouyumiao0802@163.com) (Y.Z.); [kongqiang0531@hotmail.com](mailto:kongqiang0531@hotmail.com) (Q.K.)

<sup>2</sup> Shandong Marine Forecast and Hazard Mitigation Service, Qingdao 266104, China; [dongwenlong529@163.com](mailto:dongwenlong529@163.com) (W.D.)

<sup>3</sup> College of Marine Life Sciences, Ocean University of China, Qingdao 266100, China; [linzhihao@stu.ouc.edu.cn](mailto:linzhihao@stu.ouc.edu.cn) (Z.L.)

\* Correspondence: [qshdzhhx@126.com](mailto:qshdzhhx@126.com); Tel: +86-157-6225-6586.

<sup>†</sup> These authors contributed equally to this work.

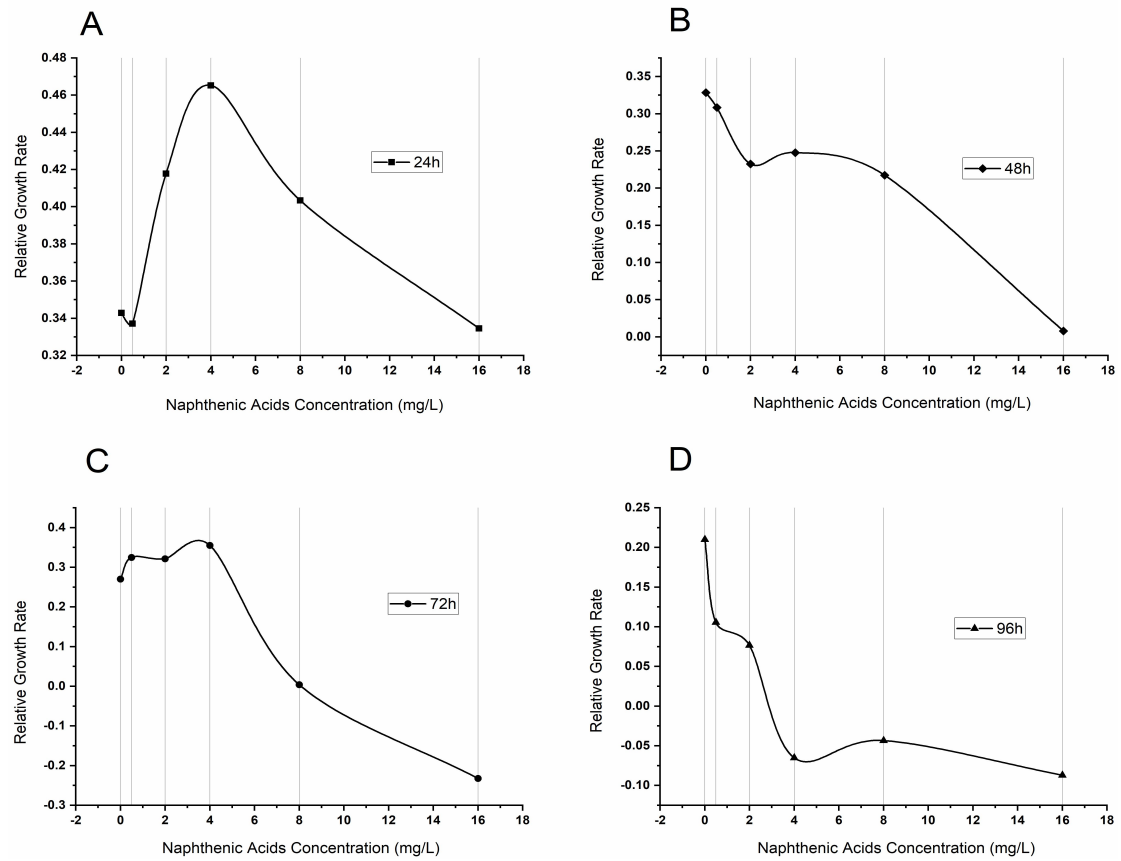

Figure. S1. Relative growth rates of *Heterosigma akashiwo* under different concentrations (0.5, 2, 4, 8 and 16 mg/L) of NAs exposure on different times (24, 48, 72 and 96 h).
